# Supplementary material for: Defective Bismuth Oxide as Effective Adsorbent for Arsenic Removal from Water and Wastewater
Source: MDPI journal article supplement (doi:10.3390/toxics9070158), 2021-07-02
Supplement: s1 [file s1]

# Supplementary Materials: Defective Bismuth Oxide as Effective Adsorbent for Arsenic Removal from Water and Wastewater

Ramona Balint, Mattia Bartoli, Pravin Jagdale, Alberto Tagliaferro, Abdul Samad Memon, Massimo Rovere and Maria Martin

## 1. Characterization of $\text{Bi}_2\text{O}_3$

### 1.1. BET

The  $\text{N}_2$  adsorption increased slowly at low relative pressures and then raised rapidly near  $p/p_0 = 0.8$  (Figure S1). According to IUPAC and Lowell et al. [1], this is defined as a type II isotherm with the hysteresis loop classified as an H3 loop, which is characteristic for monolayer coverage followed by multilayering at high relative pressures. This suggests that the synthesized  $\text{Bi}_2\text{O}_3$  is characterized by a wide distribution of pore sizes due to plate-like particles, which form slit-shaped macro- and mesopores [2]. This was supported by the low surface area of  $0.83 \text{ m}^2 \text{ g}^{-1}$  and the average pore diameter of approximately 23.8 nm, which may be attributed to the high temperature employed in the synthesis of  $\text{Bi}_2\text{O}_3$ , previously shown to cause the collapse of micropores, resulting in the formation of mesopores [3].

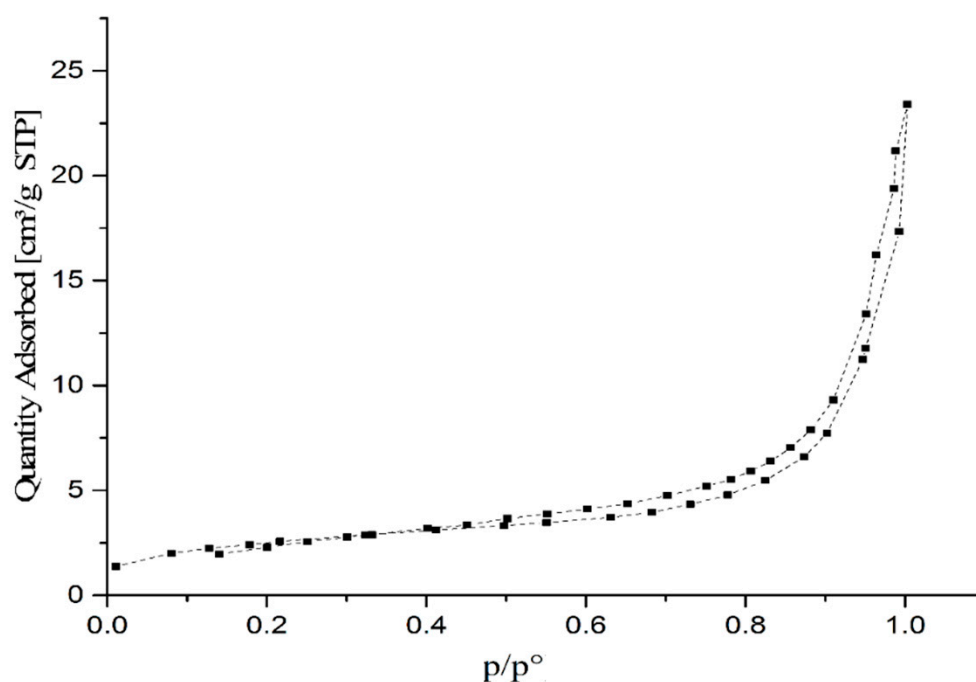

**Figure S1.**  $\text{N}_2$  adsorption-desorption isotherms of synthesized  $\text{Bi}_2\text{O}_3$ .

### 1.2. XPS

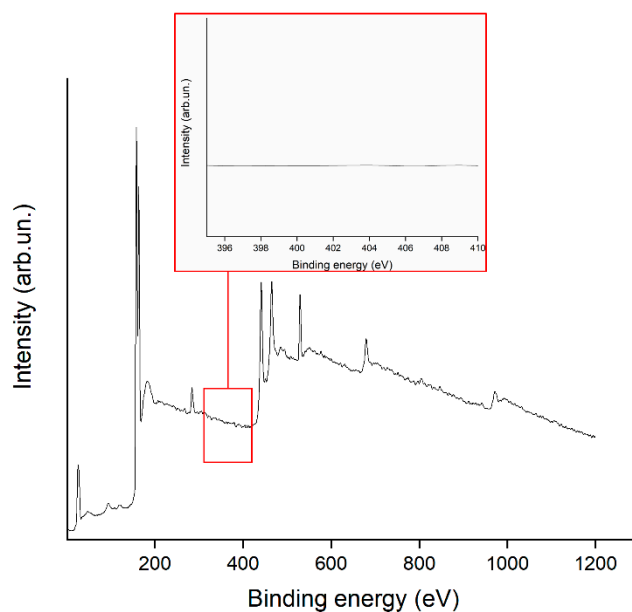

**Figure S2.** XPS spectra of Bi<sub>2</sub>O<sub>3</sub> after washing with HNO<sub>3</sub> 0.1 M.

## 2. Adsorption experiments

### 2.1. Adsorption isotherms

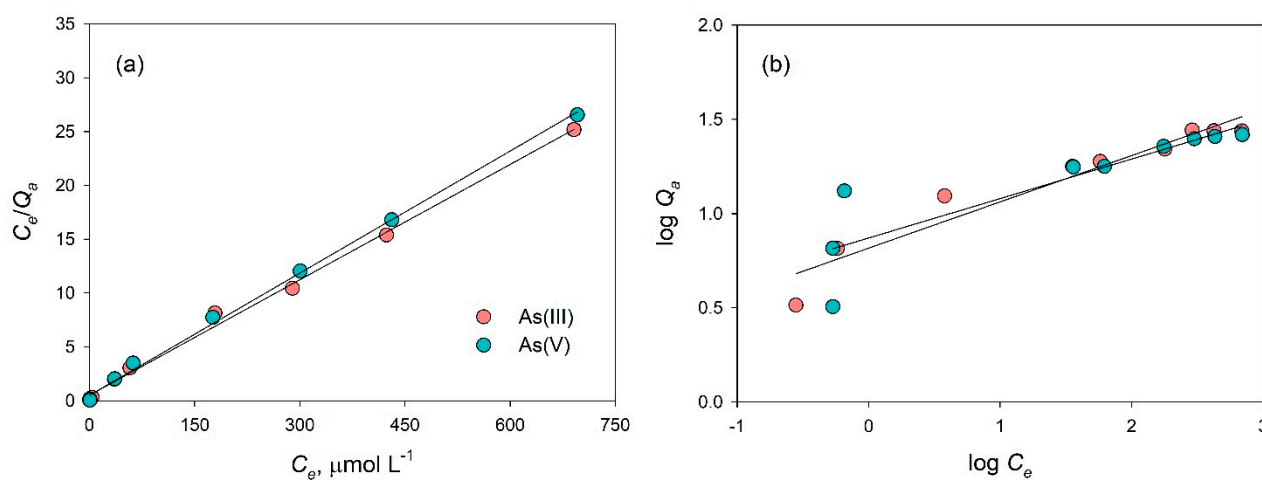

**Figure S3.** Linear Langmuir (a) and Freundlich (b) isotherms for As(III) and As(V) adsorption onto Bi<sub>2</sub>O<sub>3</sub> (4 g/L) at pH 8 and 7 respectively, and 25 ± 3 °C.

**Table S1.** Linear and non-linear forms of the Langmuir and Freundlich models, and to the two site Langmuir model used to fit the adsorption of As(III) or As(V) on Bi<sub>2</sub>O<sub>3</sub>.

| Isotherm          | Non-linear form                                                                               | Linear form                                                     |
|-------------------|-----------------------------------------------------------------------------------------------|-----------------------------------------------------------------|
| Langmuir          | $Q_a = \frac{Q_{max} K_L C_e}{1 + K_L C_e}$                                                   | $\frac{C_e}{Q_a} = \frac{C_e}{Q_{max}} + \frac{1}{K_L Q_{max}}$ |
| Freundlich        | $Q_a = K_F C_e^{\frac{1}{n}}$                                                                 | $\log Q_a = \log K_F + \frac{1}{n} \log C_e$                    |
| Two site Langmuir | $Q_a = \frac{Q_{max} K_{L1} C_e}{1 + K_{L1} C_e} + \frac{Q_{max} K_{L2} C_e}{1 + K_{L1} C_e}$ |                                                                 |

$Q_a$  (μmol g<sup>-1</sup>) - concentration of As(III) or As(V) adsorbed on Bi<sub>2</sub>O<sub>3</sub>.  $Q_{max}$ ,  $Q_{max1}$  and  $Q_{max2}$  (μmol g<sup>-1</sup>) - maximum amount of analyte that can bind to the Bi<sub>2</sub>O<sub>3</sub> as a monolayer or on type 1 and type 2 sites respectively.  $C_e$  (μmol mL<sup>-1</sup>) - equilibrium

concentration.  $K_L$ ,  $K_{L1}$  and  $K_{L2}$  ( $\text{L mol}^{-1}$ ) - Langmuir affinity constants of the monolayer and the type 1 and type 2 sites.  $K_F$  - Freundlich constant, representing adsorption capacity at unitarian concentration at equilibrium.  $1/n$  - empirical constant, indicating the adsorption intensity of the system.

## 2.2. Adsorption kinetics

**Table S2.** Pseudo-first-order, pseudo-second-order and intraparticle diffusion models used to fit the kinetic data of As(III) and As(V) adsorption on  $\text{Bi}_2\text{O}_3$ .

| Model                   | Equation                              |
|-------------------------|---------------------------------------|
| Pseudo-first-order      | $q_t = q_e(1 - e^{-k_1 t})$           |
| Pseudo-second-order     | $q_t = k_2 q_e^2 t / (1 + k_2 q_e t)$ |
| Intraparticle diffusion | $q_t = k_{id} \times t^{0.5} + C$     |

$q_t$  ( $\mu\text{mol g}^{-1}$ ) - concentration of As(III) or As(V) adsorbed on  $\text{Bi}_2\text{O}_3$  at any time  $t$ .  $q_e$  ( $\mu\text{mol g}^{-1}$ ) - concentration of As(III) or As(V) adsorbed on  $\text{Bi}_2\text{O}_3$  at equilibrium.  $t$  (min) - time.  $k_1$  ( $\text{min}^{-1}$ ),  $k_2$  ( $\text{g}/\mu\text{mol}/\text{min}$ ),  $k_{id}$  ( $\mu\text{mol}/\text{g}/\text{min}^{0.5}$ ) - adsorption rate constants.  $C$  - constant corresponding to the thickness of boundary layer.

## References

1. S. Lowell, J.E. Shields, M.A. Thomas, M. Thommes, Characterization of porous solids and powders: surface area, pore size and density, Springer Science & Business Media, 2012.
2. Awoke, Y.; Chebude, Y.; Díaz, I. Controlling Particle Morphology and Pore Size in the Synthesis of Ordered Mesoporous Materials. *Molecules* 2020, 25, 4909. <https://doi.org/10.3390/molecules25214909>
3. Lan, X., Jiang, X., Song, Y., Jing, X. & Xing, X. (2019). The effect of activation temperature on structure and properties of blue coke-based activated carbon by  $\text{CO}_2$  activation. *Green Processing and Synthesis*, 8(1), 837-845. <https://doi.org/10.1515/gps-2019-0054>.
